# Supplementary material for: Anti-Photoaging Effect of Phaseolus angularis L. Extract on UVB-Exposed HaCaT Keratinocytes and Possibilities as Cosmetic Materials
Source: MDPI journal article supplement (doi:10.3390/molecules28031407), 2023-02-01
Supplement: s1 [file s1]

**Table S1. Oligonucleotide primers used for RT-PCR**

| NCBI accession code | Primer <sup>a</sup>      | Sequence (5'-3')                         |
|---------------------|--------------------------|------------------------------------------|
| XM_011526432.2      | Human GAPDH              | Sense<br>ACC ACA GTC CAT GCC ATC AC      |
|                     |                          | Antisense<br>CCA CCA CCC TGT TGC TGT AG  |
| NM_001145938.2      | Human MMP-1              | Sense<br>TGC GCA CAA ATC CCT TCT AC      |
|                     |                          | Antisense<br>TTC AAG CCC ATT TGG CAG TT  |
| NM_000088.4         | Human Procollagen Type I | Sense<br>CTC GAG GTG GAC ACC CT          |
|                     |                          | Antisense<br>CAG CTG GAT GGC CAC ATC GG  |
| NG_013364.1         | Human TGF- $\beta$ 1     | Sense<br>GCC CTG GAC ACC AAC TAT TGC     |
|                     |                          | Antisense<br>GCT GCA CTT GCA GGA GCG CAC |

**a: Primer design based on the NCBI/Primer-BLAST tool with standard parameters**
